# Supplementary material for: Self-cascade MoS2 nanozymes for efficient intracellular antioxidation and hepatic fibrosis therapy
Source: Royal Society of Chemistry journal article supplement (doi:10.1039/d1nr02366g), 2021-01-01
Supplement: d1nr02366g1.pdf [file d1nr02366g1.pdf]

## Supporting Information

### Self-cascade MoS<sub>2</sub> nanozymes for efficient intracellular antioxidation and hepatic fibrosis therapy

Xinyu Zhang,<sup>#a,b</sup> Shitong Zhang,<sup>b,#</sup> Zaixing Yang,<sup>b</sup> Zhuanhua Wang,<sup>\*a</sup> Xin Tian,<sup>\*b</sup> and

Ruhong Zhou<sup>\*b,c,d</sup>

<sup>a</sup> *Institute of Biotechnology, Key Laboratory of Chemical Biology and Molecular Engineering of Ministry of Education, Shanxi University, Taiyuan 030006, China.*

<sup>b</sup> *State Key Laboratory of Radiation Medicine and Protection, School of Radiation Medicine and Protection, School for Radiological and Interdisciplinary Sciences (RAD-X), Collaborative Innovation Center of Radiation Medicine of Jiangsu Higher Education Institutions, Soochow University, Suzhou 215123, China*

<sup>c</sup> *Institute of Quantitative Biology, College of Life Sciences, Zhejiang University, Hangzhou 310058, China*

<sup>d</sup> *Department of Chemistry, Columbia University, New York, NY 10027, United States*

<sup>#</sup>These authors contributed equally to this work.

<sup>\*</sup>Corresponding authors: E-mail: zhwang@sxu.edu.cn; xtian@suda.edu.cn; rz24@columbia.edu.

## Other Methods

### Electron spin resonance measurements

All electron spin resonance (ESR) measurements were carried out at ambient temperature using a Bruker E500 ESR spectrometer.

*Measurement of CAT-like activity.* Electron spin resonance (ESR) spin label oximetry was employed to investigate the oxygen generation from  $\text{H}_2\text{O}_2$  catalyzed by  $\text{MoS}_2$  nanosheets at two pH levels. Sample solutions including 0.1 mM spin label  $^{15}\text{N}$ -PDT (Cambridge Isotope Labs, USA), 100  $\mu\text{g}/\text{mL}$   $\text{MoS}_2$  nanosheets, and buffer solutions (pH 4.5 or 7.4) were deoxygenated with nitrogen before the initiation of reactions by addition of 1.0 mM  $\text{H}_2\text{O}_2$ . ESR spectral measurements were obtained using the following settings: 0.04 G field modulation, 3 G scan range, and 1 mW microwave power.

*Measurement of SOD-like activity.* To investigate the  $\text{O}_2^{\bullet-}$  scavenging ability of  $\text{MoS}_2$  nanosheets, two  $\text{O}_2^{\bullet-}$  sources, xanthine-xanthine oxidase (XAN-XOD) and  $\text{KO}_2/18\text{-crown-6-ether}$  systems, were used to generate  $\text{O}_2^{\bullet-}$ . BMPO (Dojindo Laboratories, Japan) was used to trap the  $\text{O}_2^{\bullet-}$  in the form of spin adduct  $\text{BMPO}/\bullet\text{OOH}$ . ESR spectral measurements were obtained using the following settings: 1 G field modulation, 100 G scan range, and 20 mW microwave power.

*Measurement of antioxidative effects of  $\text{MoS}_2$  nanosheets through interaction with cytochrome *c*/ $\text{H}_2\text{O}_2$ .* Oxidation of the spin trap DMPO (Dojindo Laboratories, Japan), to form 5,5-dimethyl-1-pyrrolidone-N-oxyl (DMPOX), was monitored by ESR to determine the effects of  $\text{MoS}_2$  nanosheets on cytochrome *c* (Cyt *c*)'s ability to catalyze

the oxidation of substrates by  $\text{H}_2\text{O}_2$ . Time dependence of the ESR signal for the Cyt *c*/ $\text{H}_2\text{O}_2$  system with  $\text{MoS}_2$  nanosheets or PBS (control) was measured. ESR spectral measurements were obtained using the following settings: 1 G field modulation, 100 G scan range, and 10 mW microwave power.

**Table S1** Michaelis-Menten parameters of MoS<sub>2</sub> nanosheets.

| Substrate                     | $K_m$<br>(mM) | $V_{\max}$<br>(10 <sup>-6</sup> M s <sup>-1</sup> ) | $K_{\text{cat}}$<br>(10 <sup>-3</sup> s <sup>-1</sup> ) | $K_{\text{cat}}/K_m$<br>(10 <sup>-3</sup> mM <sup>-1</sup> s <sup>-1</sup> ) |
|-------------------------------|---------------|-----------------------------------------------------|---------------------------------------------------------|------------------------------------------------------------------------------|
| H <sub>2</sub> O <sub>2</sub> | 0.04          | 0.66                                                | 1.05                                                    | 26.25                                                                        |
| GSH                           | 1.68          | 0.94                                                | 1.50                                                    | 0.89                                                                         |

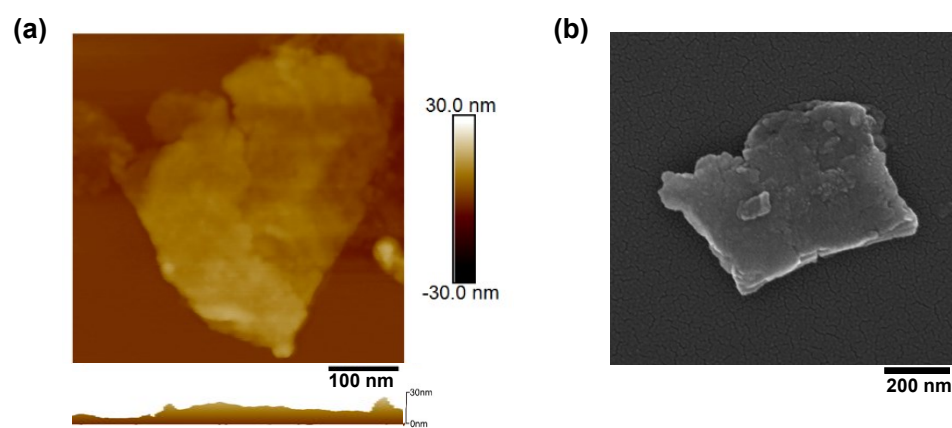

**Fig. S1** (a) AFM and (b) SEM images of MoS<sub>2</sub> nanosheets.

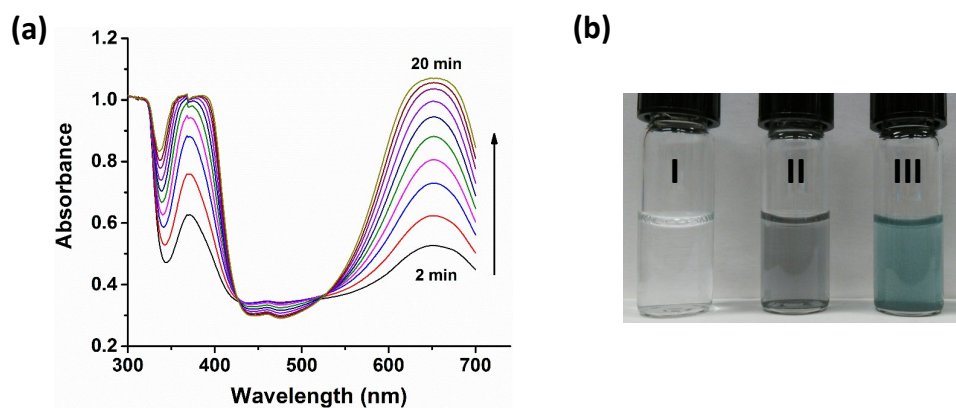

**Fig. S2** (a) The absorbance spectra of TMB oxidized by MoS<sub>2</sub> nanosheets. (b) Typical photographs of TMB reaction solutions oxidized by MoS<sub>2</sub> nanosheets in the presence of H<sub>2</sub>O<sub>2</sub> under pH 4.5. (I) 1 mM H<sub>2</sub>O<sub>2</sub> and 1 mM TMB; (II) 100 µg/mL MoS<sub>2</sub> nanosheets and 1 mM TMB; (III) 1 mM H<sub>2</sub>O<sub>2</sub>, 1 mM TMB and 100 µg/mL MoS<sub>2</sub> nanosheets.

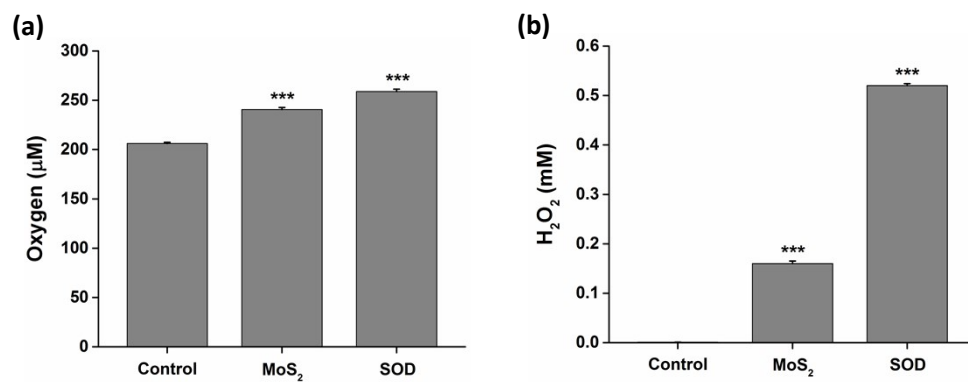

**Fig. S3** The quantification of (a) oxygen and (b) H<sub>2</sub>O<sub>2</sub> production from superoxide turnover by MoS<sub>2</sub> nanosheets vs 1 U/mL SOD in KO<sub>2</sub>/18-crown-6-ether system. \*\*\* $p < 0.001$  when compared with control group.

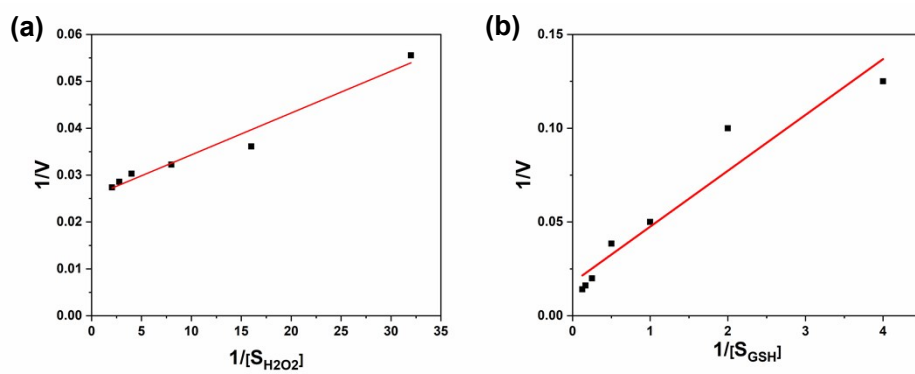

**Fig. S4** Corresponding double-reciprocal plots of MoS<sub>2</sub> nanosheets at a fixed concentration of one substrate *versus* varying the concentration of another for (a) H<sub>2</sub>O<sub>2</sub> and (b) GSH.

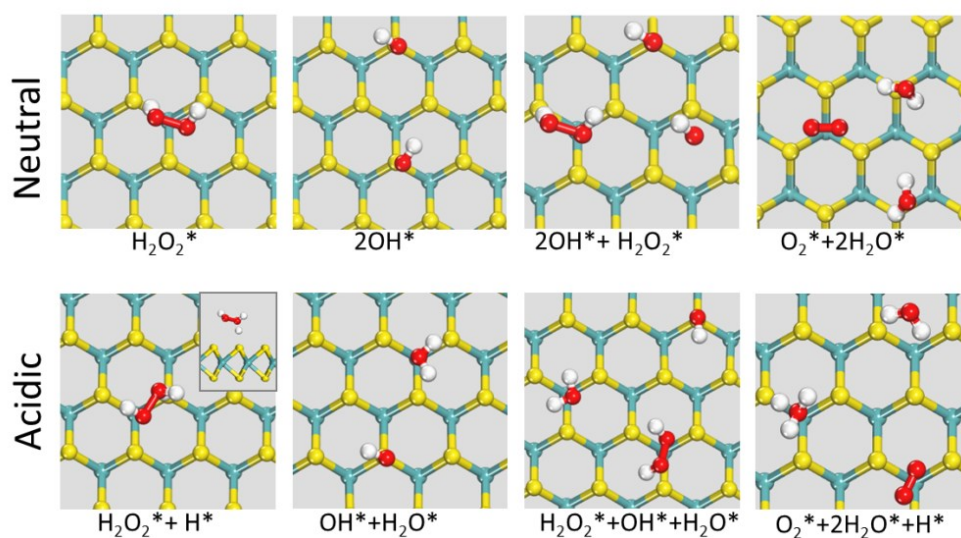

**Fig. S5** Lowest-energy adsorption structures of the intermediate species during the  $\text{H}_2\text{O}_2$  decomposition process on the basal plane of the  $\text{MoS}_2$  nanosheets under neutral (top panel) and acidic (bottom panel) conditions (white, H; red, O; yellow, S; cyan, Mo).

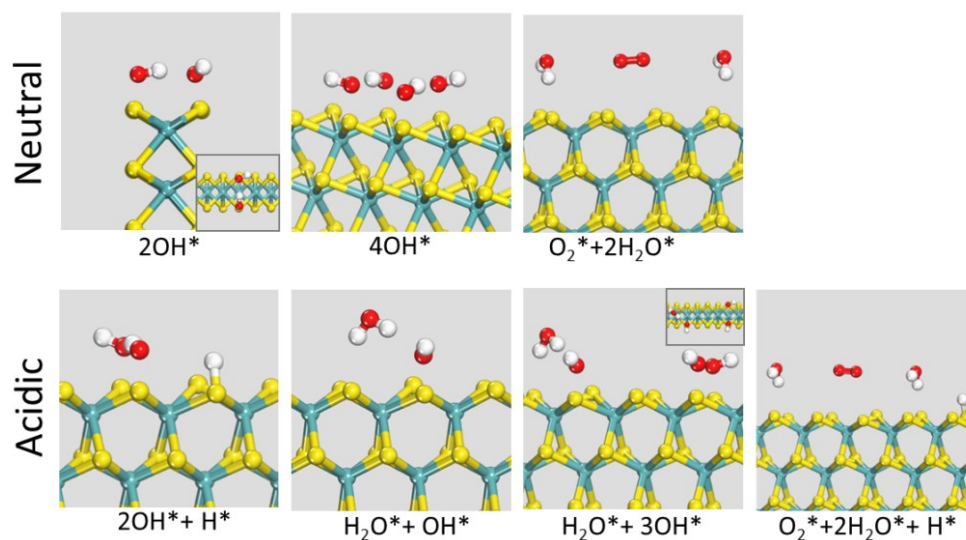

**Fig. S6** Lowest-energy adsorption structures of the intermediate species during the  $H_2O_2$  decomposition process on the Mo-S-edge of the  $MoS_2$  nanosheets under neutral (top panel) and acidic (bottom panel) conditions (white, H; red, O; yellow, S; cyan, Mo). Here, it is noteworthy that the adsorption of  $H_2O_2$  on Mo-S-edge is a chemical dissociative adsorption.

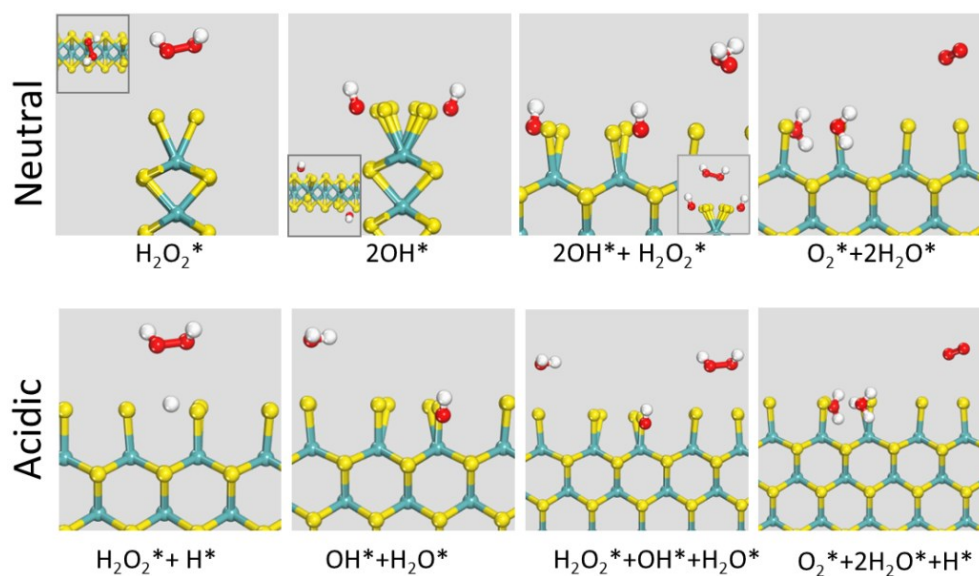

**Fig. S7** Lowest-energy adsorption structures of the intermediate species during the  $\text{H}_2\text{O}_2$  decomposition process on the S-edge of the  $\text{MoS}_2$  nanosheets under neutral (top panel) and acidic (bottom panel) conditions (white, H; red, O; yellow, S; cyan, Mo).

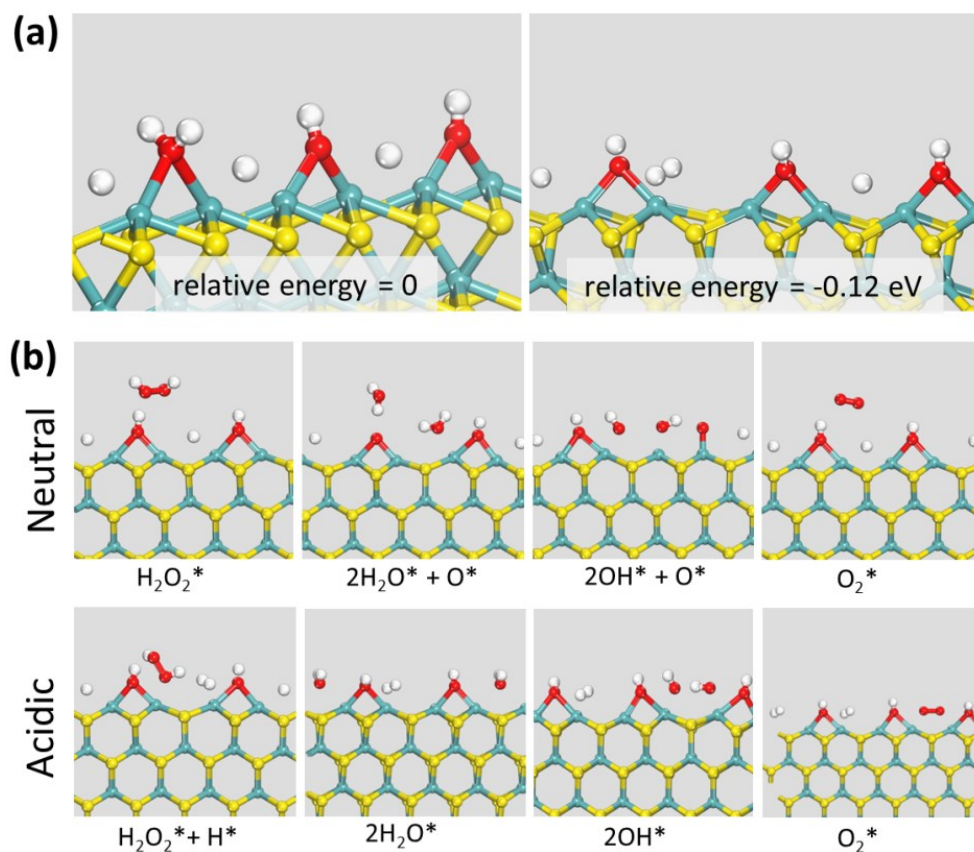

**Fig. S8** (a) Comparison between two stable adsorptions of  $\text{H}^+$  on the Mo-edge; the adsorption at the H-site is more energetically stable. (b) Lowest-energy adsorption structures of the intermediate species during the  $\text{H}_2\text{O}_2$  decomposition process on the Mo-edge of the  $\text{MoS}_2$  nanosheets under neutral (top panel) and acidic (bottom panel) conditions (white, H; red, O; yellow, S; cyan, Mo).

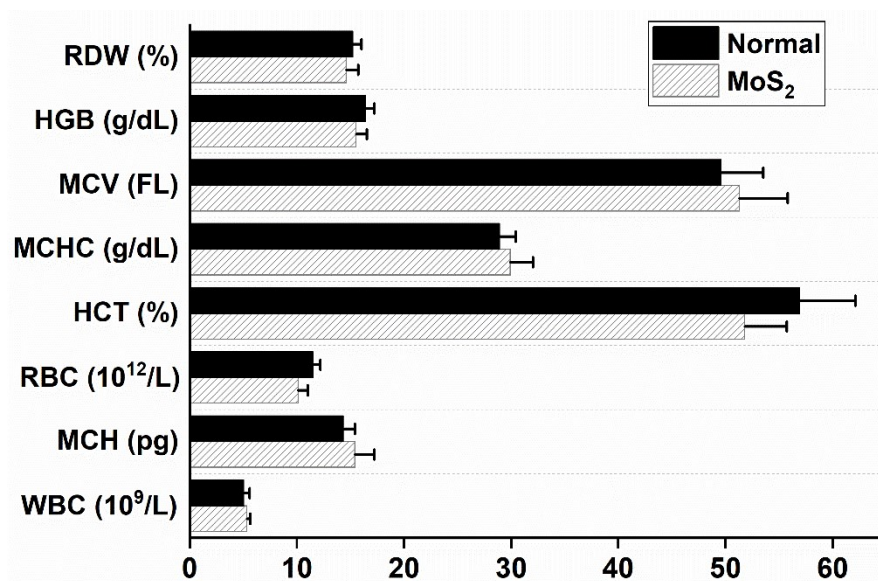

**Fig. S9** Blood hematology data of mice injected with saline (normal group) or MoS<sub>2</sub> nanosheets (0.5 mg/kg.bw) once a week for four weeks.
